# Supplementary material for: Synthesis of two potential anticancer copper(ii) complex drugs: their crystal structure, human serum albumin/DNA binding and anticancer mechanism
Source: Royal Society of Chemistry journal article supplement (doi:10.1039/c6nj02483a), 2017-01-01
Supplement: c6nj02483a1.pdf [file c6nj02483a1.pdf]

**Electronic Supporting Information (ESI)**

*New Journal of Chemistry*

**Synthesis of two potential anticancer copper(II) complexes drugs: crystal structure, human serum albumin/DNA binding and anticancer mechanism**

Kun Hu<sup>a</sup>, Feiyan Li<sup>a</sup>, Zhong Zhang<sup>a</sup> and Fupei Liang<sup>\*a,b</sup>

<sup>a</sup>*State Key Laboratory Cultivation Base for Chemistry and Molecular Engineering of Medicinal Resources, School of Chemistry and Pharmacy, Guangxi Normal University, 15 Yucai Road, Guilin 541004, P. R. China., Fax, 086-773-2120958 ; E-mail: fliangoffice@yahoo.com*

<sup>b</sup>*Guangxi Key Laboratory of Electrochemical and Magnetochemical Functional Materials, College of Chemistry and Bioengineering, Guilin University of Technology, Guilin 541004, China*

## Supplementary material

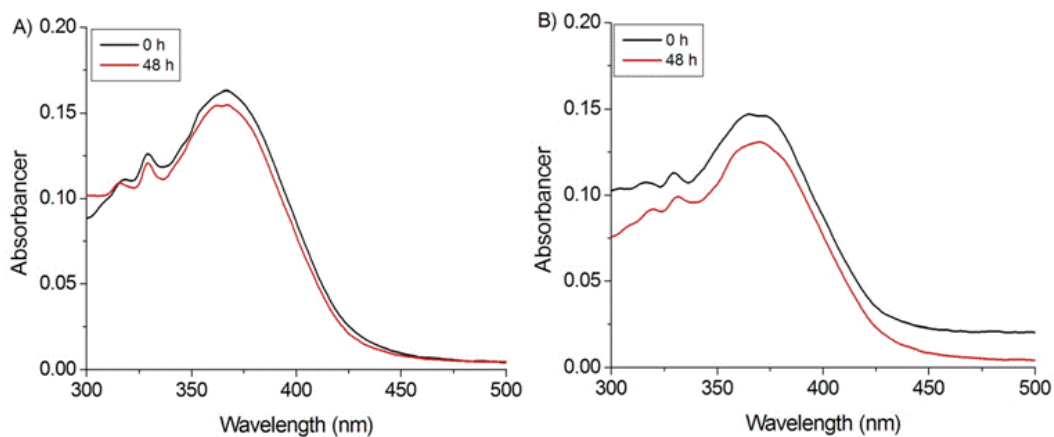

**Fig.S1:** UV-Vis absorption spectra of **1** (A) and **2** (B) ( $1.0 \times 10^{-6}$  M) in TBS (0.1% DMSO) with time course 0 and 48 h, respectively.

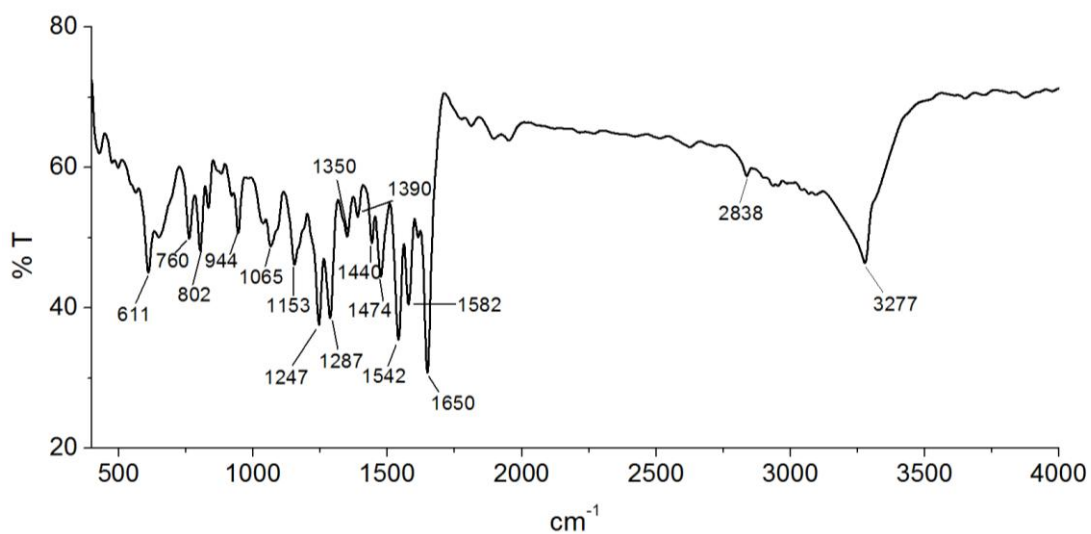

**Fig. S2:** FT-IR (KBr) spectra of L1.

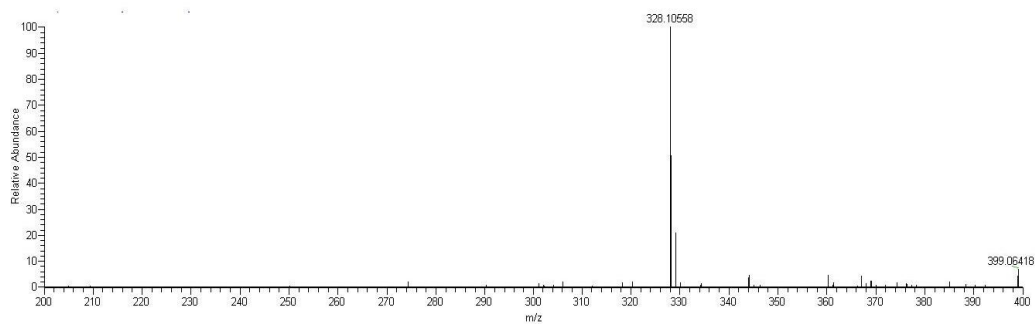

**Fig. S3:** HRMS(ESI) spectra of L1. Calcd. for  $C_{18}H_{15}N_3O_2 [M+Na]^+$  328.10620, found 328.10558.

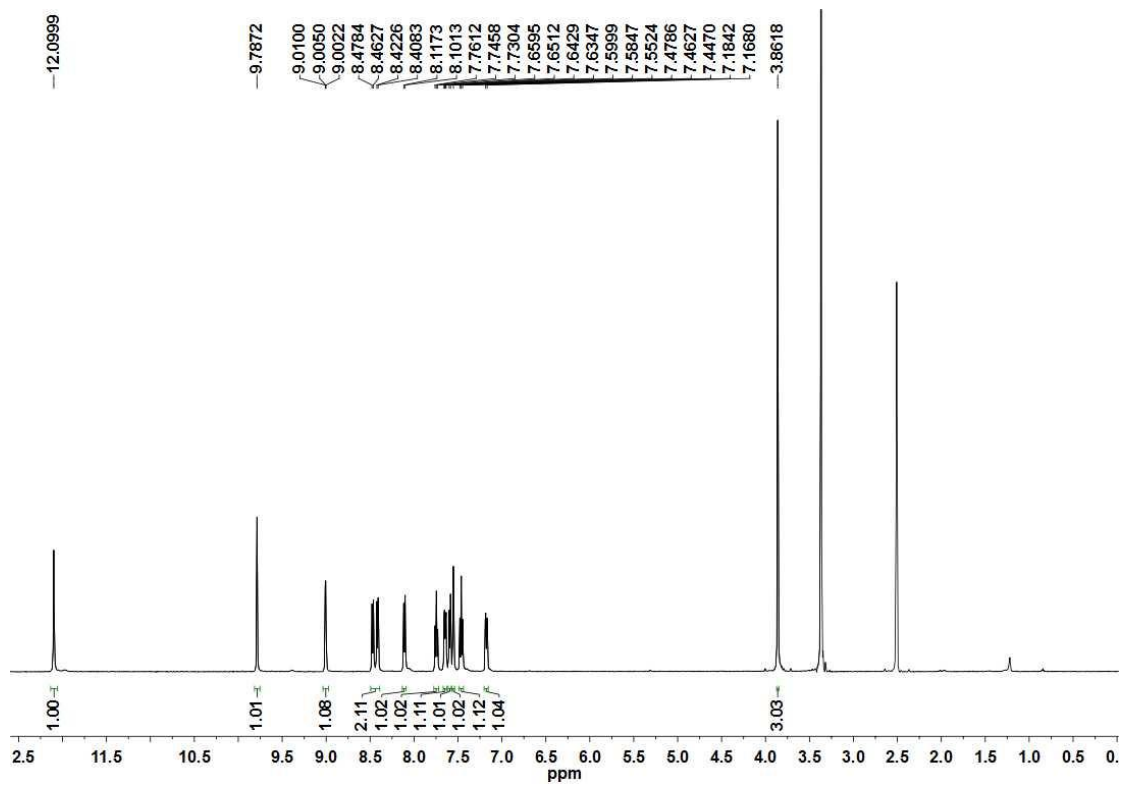

**Fig. S4:**  $^1H$  NMR spectra of L1 in DMSO.

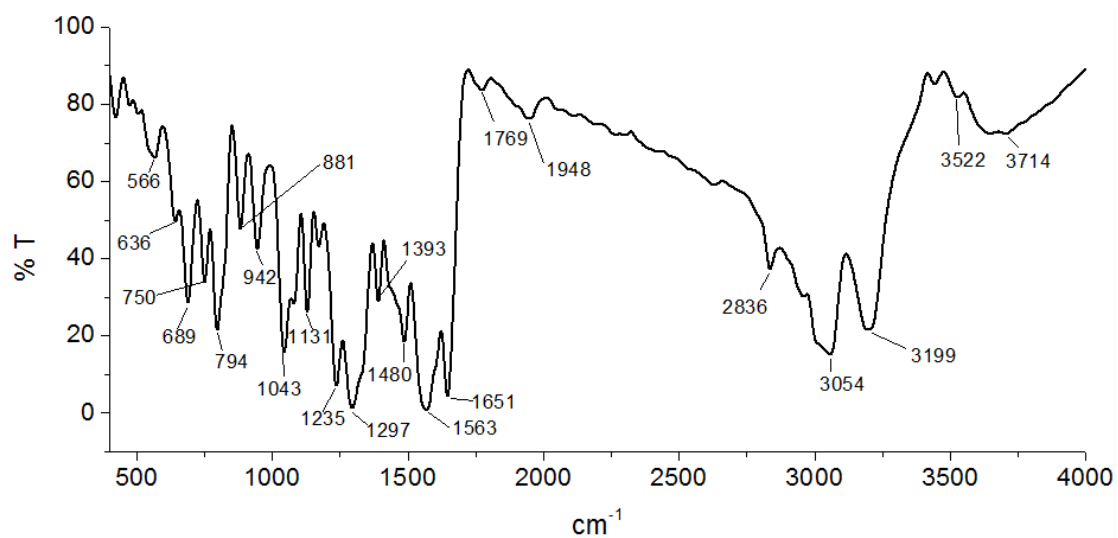

**Fig. S5:** FT-IR (KBr) spectra of L2.

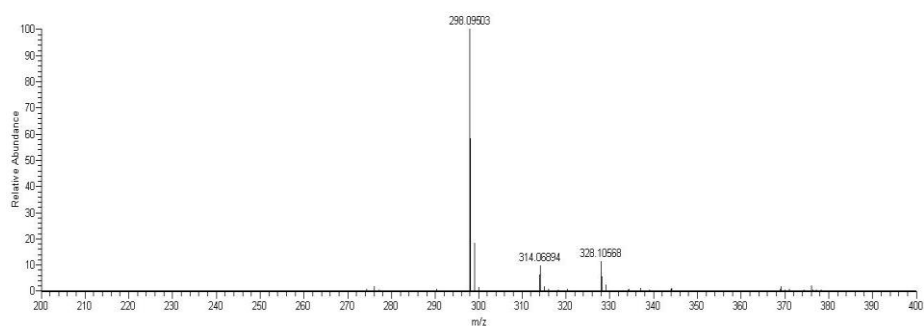

**Fig. S6:** HRMS(ESI) spectra of L2. Calcd. for  $C_{17}H_{13}N_3O$   $[M+H]^+$  298.09563, found 298.09603.

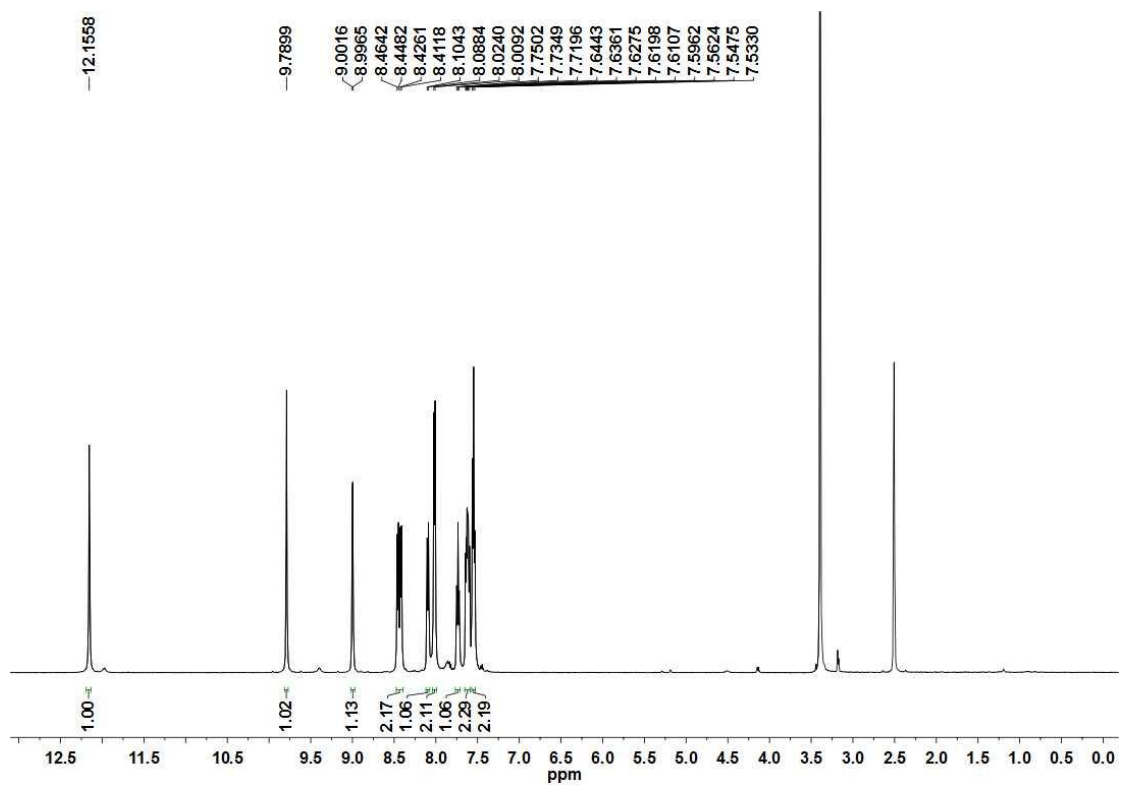

**Fig. S7:**  $^1\text{H}$  NMR spectra of L2 in DMSO.

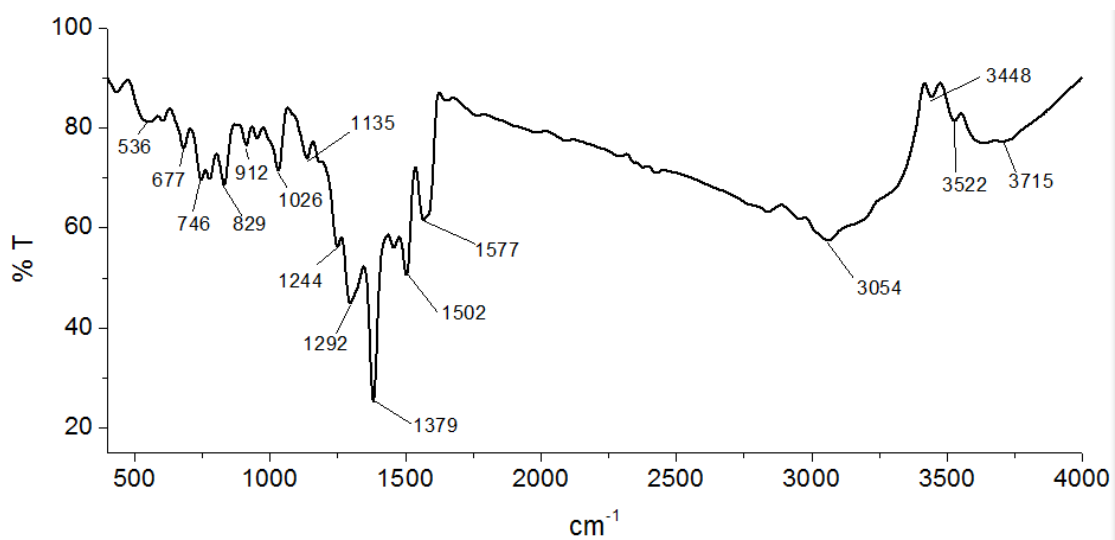

**Fig. S8:** FT-IR (KBr) spectra of complex 1.

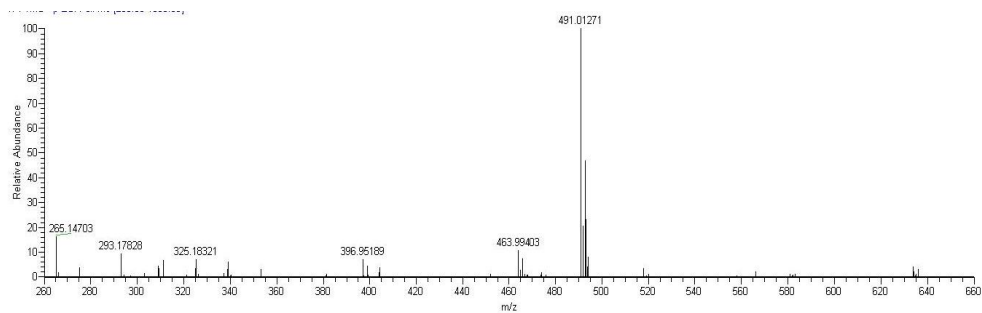

**Fig. S9:** HRMS (ESI) spectra of complex **1**. HRMS (ESI): Calcd. for  $C_{18}H_{14}N_5O_8Cu$   $[M-H]^+$  491.01384, found 491.01271.

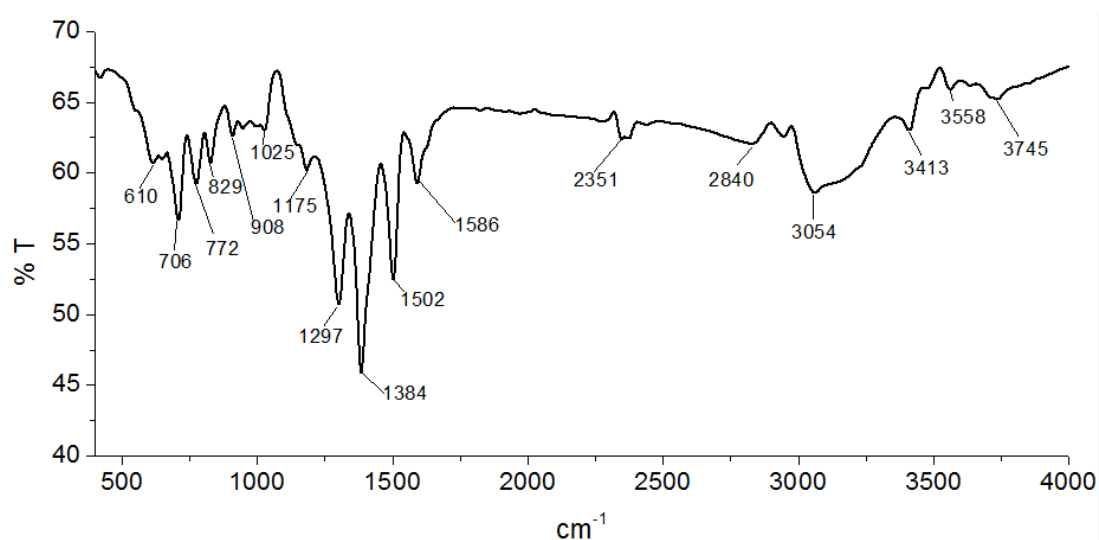

**Fig. S10:** FT-IR (KBr) spectra of complex **2**.

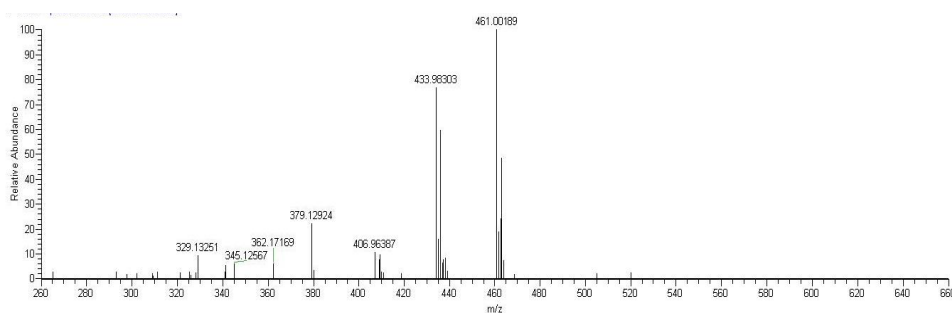

**Fig. S11:** HR-ESI-MS spectra of complex **2**. HRMS (ESI): Calcd. for  $C_{18}H_{16}N_4O_5Cu$   $[M-CH_3O^-+NO_3^-H^+]$  461.00327, found 461.00189.

**Table S1:** DNA binding constant ( $K_b$ ), Stern-Volmer constant ( $K_q$ ) and the apparent binding constant ( $K_{app}$ ) for ligands and complexes.

| Compound | $K_b$ ( $M^{-1}$ )          | $K_q$ ( $M^{-1}$ )          | $K_{app}$ ( $M^{-1}$ )      |
|----------|-----------------------------|-----------------------------|-----------------------------|
| L1       | $4.63 \times 10^3 \pm 0.25$ | $3.67 \times 10^4 \pm 0.12$ | $4.10 \times 10^5 \pm 0.11$ |
| L2       | $6.79 \times 10^3 \pm 0.15$ | $4.12 \times 10^4 \pm 0.22$ | $4.48 \times 10^5 \pm 0.21$ |
| <b>1</b> | $1.39 \times 10^4 \pm 0.32$ | $5.91 \times 10^4 \pm 0.13$ | $1.48 \times 10^6 \pm 0.02$ |
| <b>2</b> | $1.67 \times 10^4 \pm 0.21$ | $9.62 \times 10^4 \pm 0.32$ | $1.97 \times 10^6 \pm 0.09$ |

**Table S2:** Stern-Volmer quenching constants and binding parameters of the HSA-complexes drug system at different temperatures.

|          | T<br>(K) | Stern-Volmer quenching constants |                             |        | Binding parameters          |      |        |
|----------|----------|----------------------------------|-----------------------------|--------|-----------------------------|------|--------|
|          |          | $K_q$ ( $M^{-1}s^{-1}$ )         | $K_{sv}$ ( $M^{-1}$ )       | R      | $K_{bin}$ ( $M^{-1}$ )      | n    | R      |
| <b>1</b> | 295      | $3.70 \times 10^{13} \pm 0.03$   | $1.85 \times 10^5 \pm 0.12$ | 0.9997 | $3.06 \times 10^4 \pm 0.18$ | 0.85 | 0.9989 |
|          | 305      | $2.88 \times 10^{13} \pm 0.03$   | $1.44 \times 10^5 \pm 0.09$ | 0.9876 | $2.02 \times 10^4 \pm 0.10$ |      | 0.9987 |
|          | 315      | $2.36 \times 10^{13} \pm 0.02$   | $1.18 \times 10^5 \pm 0.06$ | 0.9909 | $1.47 \times 10^4 \pm 0.15$ |      | 0.9972 |
| <b>2</b> | 295      | $4.48 \times 10^{13} \pm 0.03$   | $2.24 \times 10^5 \pm 0.12$ | 0.9992 | $1.63 \times 10^5 \pm 0.12$ | 0.97 | 0.9989 |
|          | 305      | $3.40 \times 10^{13} \pm 0.03$   | $1.70 \times 10^5 \pm 0.13$ | 0.9992 | $1.13 \times 10^5 \pm 0.10$ |      | 0.9985 |
|          | 315      | $2.74 \times 10^{13} \pm 0.02$   | $1.37 \times 10^5 \pm 0.11$ | 0.9983 | $0.89 \times 10^5 \pm 0.08$ |      | 0.9967 |

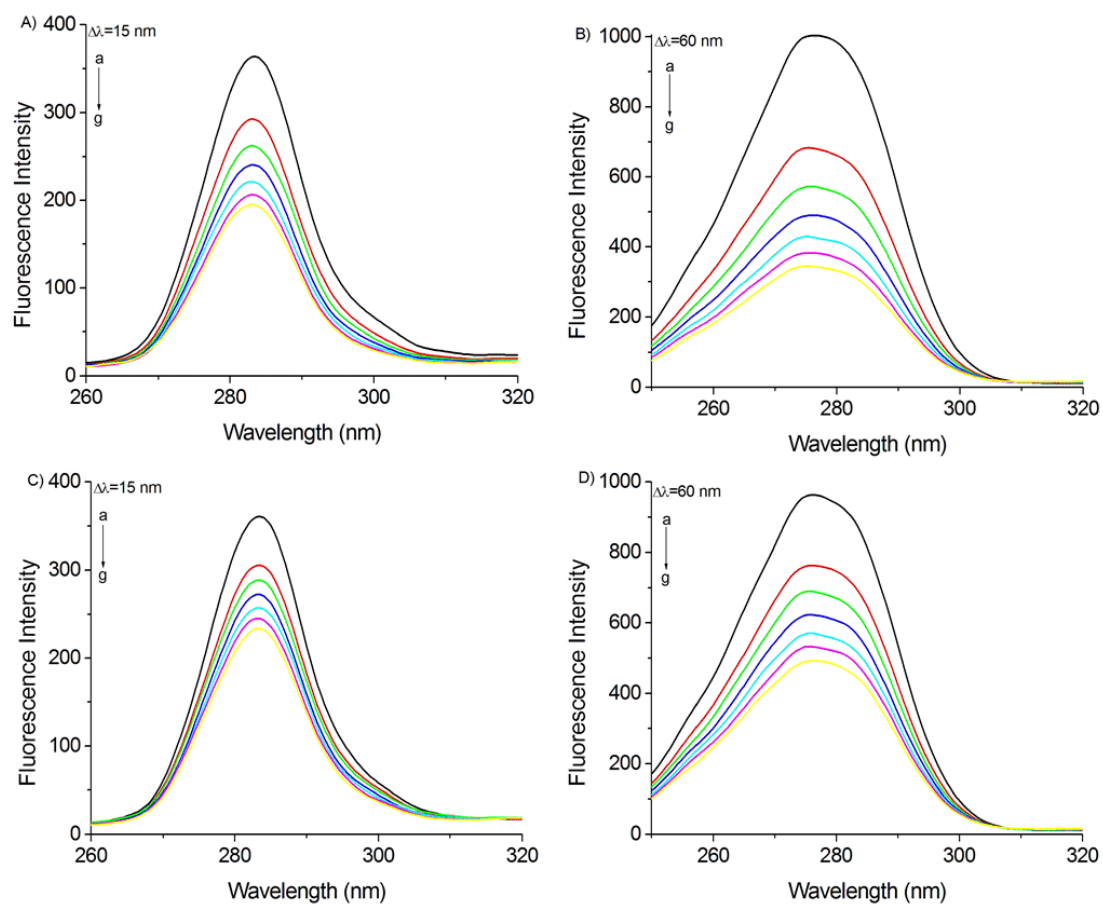

**Fig. S12:** Synchronous fluorescence spectra of HSA (1.0  $\mu\text{M}$ , black line) in presence of increasing amounts of L1 (A, B) and L2 (C, D) (0-6.0  $\mu\text{M}$ ; a to g) at the wavelength difference of  $\Delta\lambda = 15$  and  $\Delta\lambda = 60$  nm.



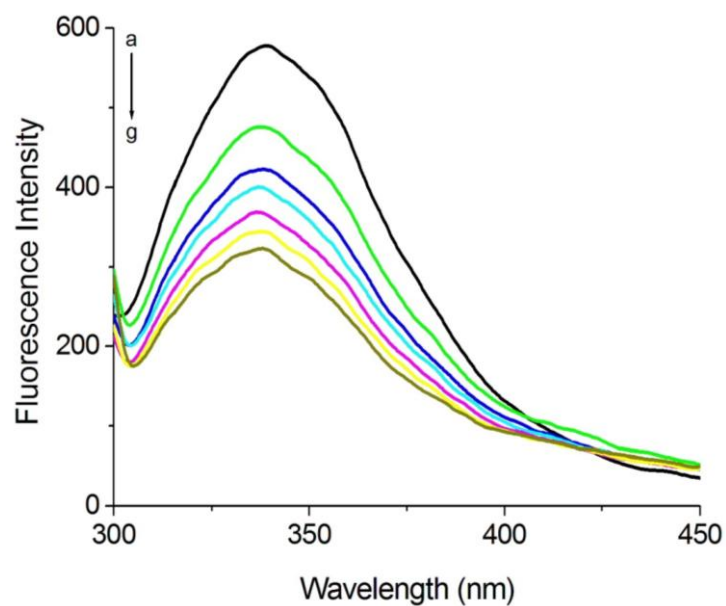

**Fig. S13:** The emission spectrum of HSA ( $1\mu\text{M}$ ;  $\lambda_{\text{ex}}=280\text{ nm}$ ) in the absence and presence of the **2** with increasing concentrations (0, 1.0, 2.0, 3.0, 4.0, 5.0 and 6.0  $\mu\text{M}$ ) from a to g at pH=4.7.

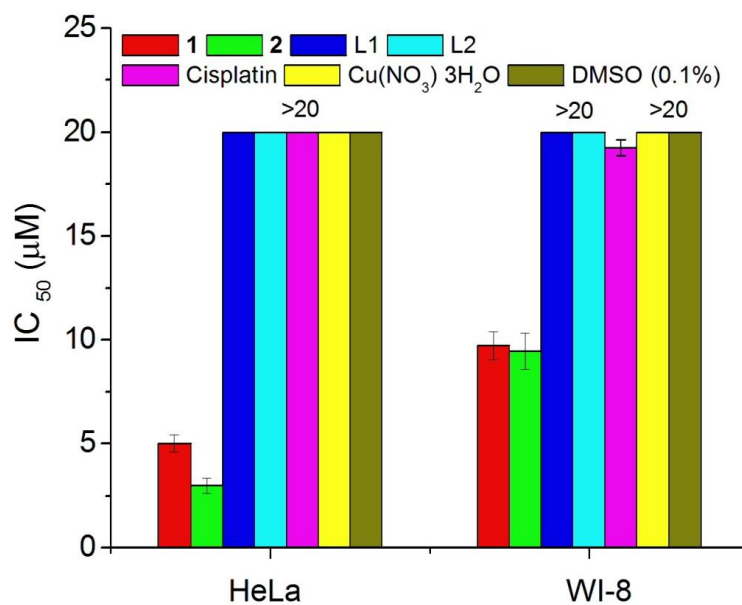

**Fig. S14:** The  $\text{IC}_{50}$  curves of L1, L2, **1**, **2** and cisplatin on the selected cells for 48 h.

**Table S3:** IC<sub>50</sub> (μM) values of L1, L2, 1, 2 and cisplatin on the selected cells for 48 h.

| Compounds                              | HeLa        | WI-8        |
|----------------------------------------|-------------|-------------|
| <b>1</b>                               | 5.01 ±0.41  | 9.71 ±0.67  |
| <b>2</b>                               | 2.98 ±0.34  | 9.45 ±0.87  |
| L1                                     | >20         | >20         |
| L2                                     | >20         | >20         |
| Cisplatin                              | 35.25 ±1.88 | 19.25 ±0.37 |
| Cu(NO <sub>3</sub> )·3H <sub>2</sub> O | >20         | >20         |
| DMSO (0.1%)                            | >20         | >20         |

**Table S4:** Log *P* values for the complexes **1**, **2** in present system, [Cu(L1)NO<sub>3</sub>] and [Cu(L2)NO<sub>3</sub>](H-L1=8-quinolinecarbaldehyde o-vanilloylhydrazone, and H-L2=8-quinolinecarbaldehyde salicylhydrazone ) in our previous work.

| Compounds                | Log <i>P</i> |                      |
|--------------------------|--------------|----------------------|
| <b>1</b>                 | 1.55 ±0.12   | In this work         |
| <b>2</b>                 | 1.62 ±0.23   |                      |
| [Cu(L1)NO <sub>3</sub> ] | 1.52 ±0.28   | In our previous work |
| [Cu(L2)NO <sub>3</sub> ] | 1.35 ±0.25   |                      |

A)

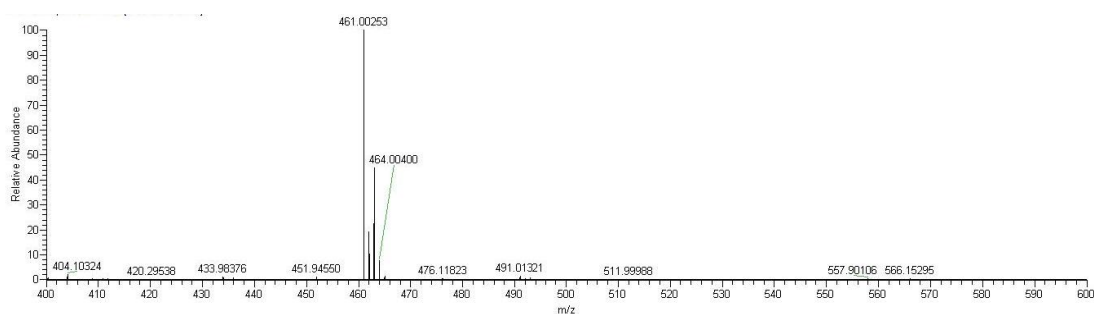

B)

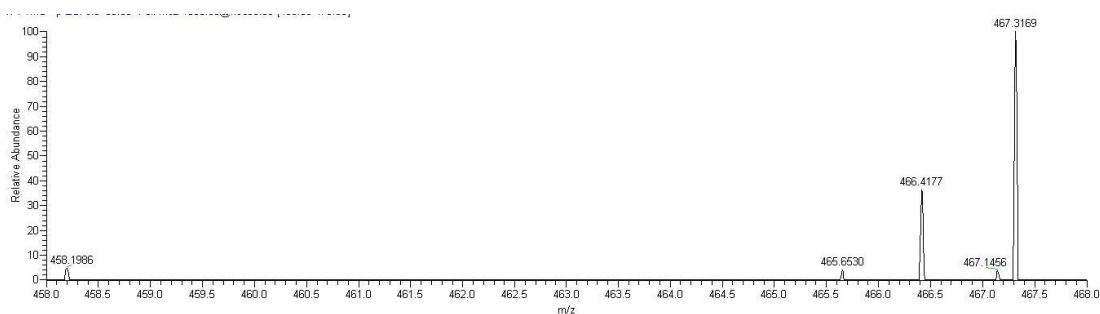

**Fig. S15:** Mass spectrometry detection of the interaction between complex **2** and mitochondria. A) Complex **2** was dissolved in DMSO and analyzed by electrospray ionization mass spectrometry at  $IC_{50}$  concentration  $[M-CH_3O^+ + NO_3^- - H^+]^-$  461.00253. B) Complex **2** directly interacted with mitochondria. Mitochondria were extracted from HeLa cells with Mitochondrial Extraction Kit and incubated with complex **2** for 1 h. The mixture was eluted 3 times and then diluted with buffer solution to make 1.0 ml.

**Table S5:** The concentration of copper ion in HeLa cell (Control), and solution of complex **2** (at  $IC_{50}$  value concentration) and mitochondrial extracts of HeLa cell after incubating for 1 h (Mitochondrial).

| Sample        | Cu(II) ( $\mu\text{g/L}$ ) |
|---------------|----------------------------|
| Control       | $2.53 \pm 0.22$            |
| Mitochondrial | $2.71 \pm 0.18$            |
